# Supplementary material
Source: Research Square preprint supplement (doi:10.21203/rs.3.rs-9809809/v1)
Supplement: Supplementary file 1 [file 620b7754bc49bd3022bacf1a.xlsx]

## Sheet: Table 1
Table 1. Health Score penalty schedule.
Anomaly Type	Condition	Penalty P(a)
CFVA (merged block)	Duration Da >= 70 days	30
CFVA (merged block)	30 <= Da < 70 days	20
CFVA (merged block)	Da < 30 days	10
MDA (end-of-record)	---	100
MDA (internal or start)	---	40
IPA	Per occurrence	5
NTA	Per occurrence	5

## Sheet: Table 2
Table 2. Operational quality categories.
HS Range	Category	Operational Action
HS >= 80	High quality	Eligible as reconstruction donor
60 <= HS < 80	Acceptable	Monitor; not used as donor
0 <= HS < 60	Poor quality	Schedule maintenance
HS < 0	Critical	Immediate field inspection; data unreliable

## Sheet: Table 3
Table 3. Summary of detected anomalies across 100 stations.
Anomaly Type	Symbol	Affected Stations	Typical Duration / Magnitude
Continuous Fixed-Value	CFVA	11	12--134 days of 0.5--1.5 mm/h
Missing Data	MDA	18	46--287 days; 5 end-of-record
Isolated Point	IPA	29	Single-hour spikes > mu + 3sigma
No-Trend Anomaly	NTA	24	Brief peaks without recession

## Sheet: Table 4
Table 4. Health score distribution across 100 stations.
Category	HS Range	Count	Percentage
High quality	HS >= 80	62	62%
Acceptable	60 <= HS < 80	17	17%
Poor quality	0 <= HS < 60	12	12%
Critical	HS < 0	9	9%
Total	---	100	100%

## Sheet: Table 5
Table 5. Quantitative comparison of five reconstruction methods (leave-one-out cross-validation). Bold denotes the best value in each column.
Method	RMSE (mm)	MAE (mm)	NSE	PBIAS (%)
IDW (Proposed)	0.281	0.182	0.979	-3.82
Arithmetic Mean (B1)	0.684	0.442	0.876	-8.77
Cubic Spline (B3)	0.651	0.419	0.889	-7.83
Linear Temporal (B2)	2.945	2.030	-1.304	-115.77
Nearest Neighbour (B4)	3.065	2.045	-1.497	-115.77

## Sheet: Table 6
Table 6. Complete list of mathematical symbols.
Symbol	Definition	Units	First used
S	Set of all monitoring stations	---	Eq. rawseq
s_i	Individual station, index i	---	Eq. rawseq
N	Total number of stations (=100)	---	Eq. rawseq
T	Discrete observation time grid	---	Eq. rawseq
t_k	k-th timestamp in T	---	Eq. rawseq
M	Total number of time steps	---	Eq. rawseq
R_i	Raw observation sequence of s_i	---	Eq. rawseq
r_i,k	Rainfall at s_i, time step t_k	mm	Eq. rawseq
R_i+	Preprocessed non-zero sequence of s_i	---	Section preproc
n_i	Number of valid non-zero records at s_i	count	Section preproc
V_fixed	Fixed-value indicator set {0.5, 1.0, 1.5} mm	mm	Eq. cfva_val
L	Length of a candidate fixed-value run	count	Eq. cfva_len
L_min	Minimum CFVA run-length threshold (=50)	count	Eq. cfva_len
t_j^(i)	j-th observation timestamp at s_i	---	Eq. gap
delta_j^(i)	Inter-observation time gap at s_i	days	Eq. gap
Delta t_min	MDA threshold (=45 days)	days	Eq. mda
t_start	Study-period start time	---	Section mda
t_end	Study-period end time	---	Section mda
mu_i	Long-term mean of non-zero records at s_i	mm	Eq. mu
sigma_i	Standard deviation of non-zero records at s_i	mm	Eq. sigma
W(t_k)	Non-zero neighbours in +/-5 h window	---	Section ipa
r_i,k-2^(+)	Second preceding non-zero observation	mm	Eq. nta
r_i,k-1^(+)	First preceding non-zero observation	mm	Eq. nta
r_i,k+1^(+)	First following non-zero observation	mm	Eq. nta
HS_i	Health Score of station s_i	points	Eq. hs
A_i	Set of detected anomaly instances at s_i	---	Eq. hs
P(a)	Penalty for anomaly instance a	points	Eq. hs
D_a	Duration of a merged CFVA block	days	Table 1
S_H	High-quality donor pool (HS >= 80)	---	Section idw
S_L	Target stations requiring reconstruction	---	Section idw
HS_min	Donor eligibility threshold (=80)	points	Eq. neighbors
phi_i	Geodetic latitude of s_i	rad	Eq. haversine
lambda_i	Geodetic longitude of s_i	rad	Eq. haversine
R_earth	Mean Earth radius (=6371 km)	km	Eq. haversine
d_ij	Haversine great-circle distance, s_i to s_j	km	Eq. haversine
d_0	Neighbour search radius (=5 km)	km	Eq. neighbors
N(s_tgt)	Active neighbour set of target station	---	Eq. neighbors
s_tgt	Target station undergoing reconstruction	---	Eq. neighbors
r_hat_tgt,k	Reconstructed rainfall at s_tgt, t_k	mm	Eq. idw
w_j(d_tgt,j)	IDW weight of donor s_j	km^(-p)	Eq. idwweight
p	IDW distance-decay power (=2)	---	Eq. idwweight
epsilon	IDW regularisation constant (=10^-6)	km^p	Eq. idwweight
r_hat_tgt,k^AM	Arithmetic mean reconstruction	mm	Eq. am
N'(t_k)	Donors with valid records at t_k	---	Eq. am
r_bar_k	Unweighted donor mean at t_k	mm	Section benchmarks
n	Number of evaluated time steps	count	Eq. rmse
r_hat_k	Reconstructed value at step k	mm	Eq. rmse
r_k^ref	Reference (true) value at step k	mm	Eq. rmse
mean(r^ref)	Mean of reference observations	mm	Eq. nse
RMSE	Root Mean Square Error	mm	Eq. rmse
MAE	Mean Absolute Error	mm	Eq. mae
NSE	Nash--Sutcliffe Efficiency	---	Eq. nse
PBIAS	Percent Bias	%	Eq. pbias
